# Supplementary material for: A multicriteria modelling framework for evaluating clean energy transitions: the case of Greece as electricity exporter
Source: Research Square preprint supplement (doi:10.21203/rs.3.rs-5213040/v1), 2025-04-25
Supplement: Supplementary file 1 [file 776177c3c11ad4cab3c0a830.docx]

Appendix A. Clean Power Technologies Input Data

Table 5. Proxy coefficients describing the potential implications of power technologies on critical materials, land use, human toxicity, and marine eutrophication per unit of installed capacity or produced electricity

| Technologies | Indicators | | | | | | | | | | | |
| --- | --- | --- | --- | --- | --- | --- | --- | --- | --- | --- | --- | --- |
| Marine eutrophication (tn N-Eq/GW) [∫] | | | | Human toxicity (1,4-DCB-Eq/GW) [∫] | | | Critical Materials (tns/GW) [∫] | | | | Land use (km2/GW) [×] |
| 2019 | 2030 | 2050 | 2019 | | 2030 | 2050 | | 2019 | 2030 | 2050 |  |
| Hydro | 4527 | 4418 | 4476 | 835 | | 792 | 769 | | 0 | 0 | 0 | 84,6 |
| Solar CSP | 421 | 395 | 369 | 447 | | 409 | 369 | | 0 | 0 | 0 | 30 |
| Solar PV | 313 | 216 | 183 | 1 019 | | 709 | 579 | | 9,3 | 9,3 | 9,3 | 34,4 [¥] |
| Wind onshore | 118 | 105 | 104 | 236 | | 196 | 177 | | 43,4 | 43,4 | 43,4 | 368,3 |
| Wind offshore | 292 | 251 | 250 | 656 | | 525 | 476 | | 43,4 | 43,4 | 43,4 | 0 |
| Grid | 0.04 [□] | | | 46.3 [□] | | | | | 0 | 0 | 0 | 0 |
| Geothermal | 0 | 0 | 0 | 0 | | 0 | 0 | | 0 | 0 | 0 | 38,8 |
| Biomass | 0 | 0 | 0 | 0 | | 0 | 0 | | 0 | 0 | 0 | 2 [~] |

[□]: the coefficient is expressed per Gigawatt hour of produced electricity, [¥]: zero land use requirements are considered for rooftop solar, [~]: additional 0.76 square kilometres per Gigawatt hour of produced electricity are considered for bioenergy cultivation, [∫]: occurring only at the “construction” phase of technologies, [×]: applying throughout the lifetime of technologies
