# Supplementary material for: A multicriteria modelling framework for evaluating clean energy transitions: the case of Greece as electricity exporter
Source: Research Square preprint supplement (doi:10.21203/rs.3.rs-5213040/v1), 2025-04-25
Supplement: Supplementary file 2 [file 7d8b07288e40843fb9bb5b06.docx]

**Appendix C. Multicriteria evaluation**

**AHP Implementation Steps for Criteria Quantification**

The factors *aij* denoting the importance of criterion *i* compared to *j*, are selected from the following scale (where *aji=1/ aij)*: (i) Strongly less important: 1/5, (ii) Moderately less important: 1/3, (iii) Equal Importance: 1, (iv) Moderately more important: 3, (v) Strongly more important: 5. This creates a square matrix A=[*aij*], from which criteria weights are derived by normalizing matrix values across columns, in turn averaging row values.

**TOPSIS Implementation Steps for Alternatives Multicriteria Evaluation**

TOPSIS is applicable to multicriteria decision problems regardless of the number of criteria and alternatives or the scale of the criteria. Let be a set of alternativesevaluated against a set of criteria , with representing the outcomes of alternative across criteria. Let denote the importance weights assigned to criteria, where *I and J* denote subsets of benefit and cost criteria, respectively. TOPSIS involves the following steps, described also in mathematical notation in Equations (C.1)-(C.7): (i) Calculating the normalized decision matrix (Equation (11)) and its weighted form (Equation (12)), (ii) Determining the positive ideal solution (PIS), , and the negative ideal solution (NIS), (Equations (13)-( 14)), (iii) Estimating the Euclidean distance of alternatives from the PIS and NIS (Equations (15)-( 16)), and finally (iv) Calculating the relative closeness *D* of alternatives to the optimal solution (Equation (17)).

| , | (11) |
| --- | --- |
|  | (12) |
|  | (13) |
|  | (14) |
|  | (15) |
|  | (16) |
|  | (17) |

*D*i values belong to the [0,1] range and compose the key outcomes of the TOPSIS method, describing the desirability of examined alternatives. A *D* value of 0 accounts for the negative ideal solution, whereas a *D* value of 1 represents the positive ideal solution. Alternatives with higher *D* values are closer to the positive ideal solution, also known as utopia, and further from the negative ideal solution, also called nadir, compared to competing alternatives. Consequently, such alternatives feature greater robustness across evaluation criteria and are consequently more likely to better serve decision maker targets than competing options. It is noteworthy that TOPSIS utilizes vectorized normalization (Equation (11)). Consequently, while its results can be influenced by the measurement units of the criteria, TOPSIS features robustness against outliers (i.e., vectorized normalization offers more resistance to outliers than the Min-Max scaling).
