# Supplementary material for: A multicriteria modelling framework for evaluating clean energy transitions: the case of Greece as electricity exporter
Source: Research Square preprint supplement (doi:10.21203/rs.3.rs-5213040/v1), 2025-04-25
Supplement: Supplementary file 3 [file d1db241af2462fc2fceeeef6.docx]

Appendix B. Modeling and Multicriteria Evaluation Results

Table 6. Payoff table displaying the aggregate performance of examined strategies over 2023-2050 across proxy indicators. Results emerge from the utilized modeling framework composed of a bottom-up optimization model and a macroeconomic general equilibrium model for Greece

| Policy | Proxy indicators | | | | | | |
| --- | --- | --- | --- | --- | --- | --- | --- |
| LCOE (Euro/MWh final demand) | Land-use (km2) | Critical material (tonnes) | Diversity of installed power (-) | Human toxicity (kilo tons 1,4-DCB-Eq) | Marine eutrophication (tons N-Eq) | GDP (% difference to baseline) |
| Baseline | 3,183.41 | 234,412.22 | 902.85 | 43.37 | 14,799.17 | 13,267.19 | 0.00 |
| Electricity exports (EURef price) | 2,157.52 | 269,673.71 | 953.06 | 47.80 | 19,604.01 | 15,063.18 | 0.56 |
| Electricity exports (-50% vs EURef price) | 2,692.76 | 272,041.82 | 967.64 | 44.84 | 18,242.63 | 6,825.21 | 0.32 |

Table 7. Positive ideal solutions (p_max) and negative ideal solutions (p_min) recorded between the examined strategies across the evaluation criteria (p_max and p_min are calculated as per Eqs. (11)-(12))

| Scenarios for criteria weights | Ideal solution type | Results | | | | | | |
| --- | --- | --- | --- | --- | --- | --- | --- | --- |
| Balanced | p_max | 0.07 | 0.07 | 0.08 | 0.09 | 0.07 | 0.05 | 0.12 |
| p_min | 0.10 | 0.09 | 0.08 | 0.08 | 0.09 | 0.10 | 0.00 |
| Cost-focused | p_max | 0.17 | 0.08 | 0.03 | 0.09 | 0.03 | 0.02 | 0.13 |
| p_min | 0.25 | 0.09 | 0.03 | 0.09 | 0.04 | 0.04 | 0.00 |
| Land use-focused | p_max | 0.07 | 0.19 | 0.03 | 0.09 | 0.03 | 0.02 | 0.13 |
| p_min | 0.11 | 0.22 | 0.03 | 0.09 | 0.04 | 0.04 | 0.00 |
| Critical Material-focused | p_max | 0.03 | 0.03 | 0.21 | 0.04 | 0.09 | 0.06 | 0.06 |
| p_min | 0.04 | 0.04 | 0.23 | 0.04 | 0.11 | 0.13 | 0.00 |
| Energy security-focused | p_max | 0.07 | 0.08 | 0.03 | 0.22 | 0.03 | 0.02 | 0.13 |
| p_min | 0.11 | 0.09 | 0.03 | 0.20 | 0.04 | 0.04 | 0.00 |
| Human health-focused | p_max | 0.03 | 0.03 | 0.10 | 0.04 | 0.19 | 0.06 | 0.06 |
| p_min | 0.04 | 0.04 | 0.11 | 0.04 | 0.25 | 0.13 | 0.00 |
| Biodiversity-focused | p_max | 0.03 | 0.03 | 0.10 | 0.04 | 0.09 | 0.12 | 0.06 |
| p_min | 0.04 | 0.04 | 0.11 | 0.04 | 0.11 | 0.27 | 0.00 |
| GDP-focused | p_max | 0.07 | 0.08 | 0.03 | 0.09 | 0.03 | 0.02 | 0.32 |
| p_min | 0.11 | 0.09 | 0.03 | 0.09 | 0.04 | 0.04 | 0.00 |
